# Supplementary material
Source: publisher figshare collection journal article supplement (https://sage.figshare.com/ndownloader/files/21819294)

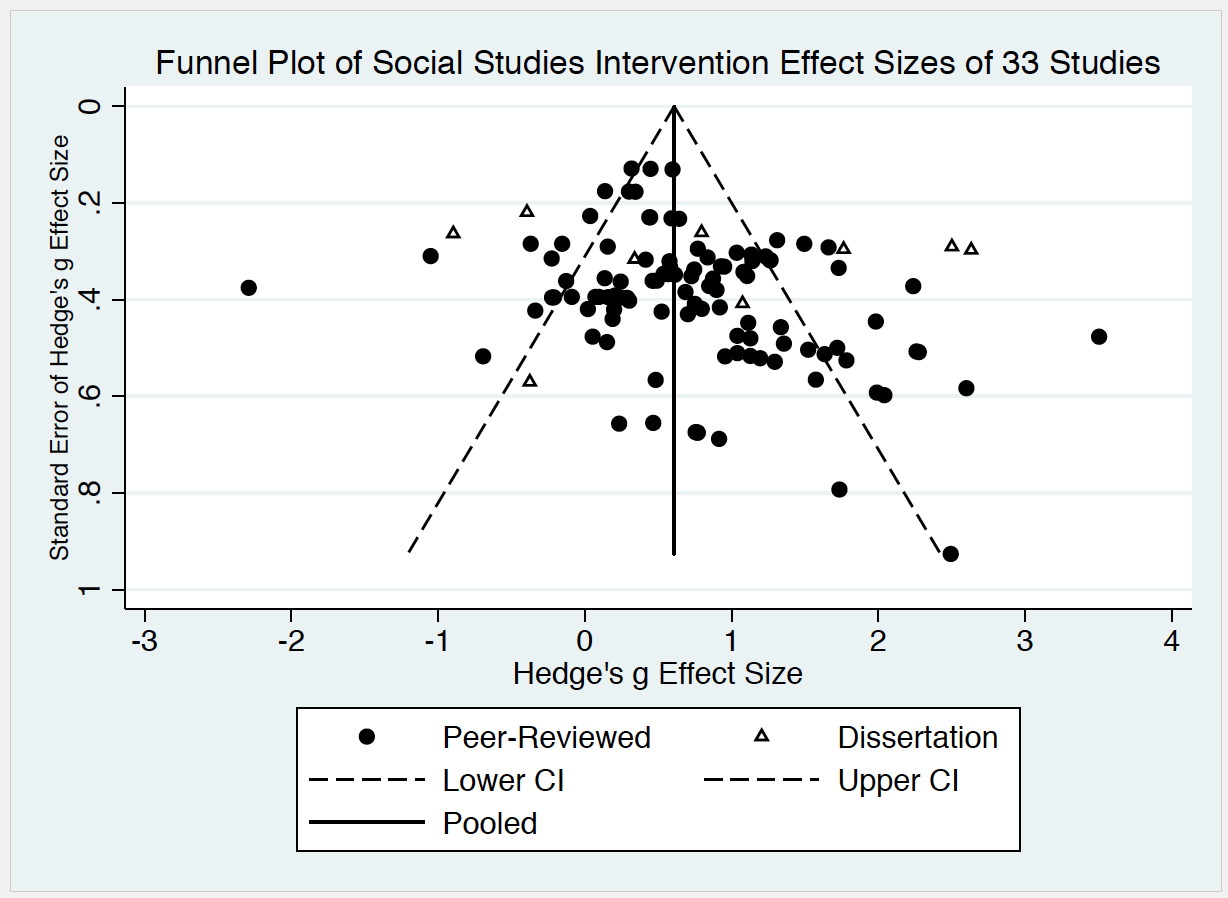


*Figure 1 (Supplementary File)..* Funnel plot used to explore the possibility of publication bias.

Supplement: Supplementary file 1 [file 21819294]
